# Supplementary material
Source: PubMed Central journal article supplement (PMC5957756)
Supplement: NIHMS965910-supplement-Supplemental_Table_S1.pdf [file NIHMS965910-supplement-Supplemental_Table_S1.pdf]

| Precursor ions | Transitions | PeptideSequence                                            |
|----------------|-------------|------------------------------------------------------------|
| 765.922989     | 1346.717524 | sequence1.ALPGEQQLHALTR.+2y12.light                        |
| 765.922989     | 807.483548  | sequence1.ALPGEQQLHALTR.+2y7.light                         |
| 765.922989     | 673.8624    | sequence1.ALPGEQQLHALTR.+2y12+2.light                      |
| 765.922989     | 404.245412  | sequence1.ALPGEQQLHALTR.+2y7+2.light                       |
| 765.922989     | 724.36243   | sequence1.ALPGEQQLHALTR.+2b7.light                         |
| 765.922989     | 1071.558169 | sequence1.ALPGEQQLHALTR.+2b10.light                        |
| 773.319775     | 575.260607  | sequence1.AQETS[Pho]GEEIS[Pho]KFYLPNC[CAM]NK.+3y5.light    |
| 773.319775     | 261.155731  | sequence1.AQETS[Pho]GEEIS[Pho]KFYLPNC[CAM]NK.+3y2.light    |
| 773.319775     | 944.883043  | sequence1.AQETS[Pho]GEEIS[Pho]KFYLPNC[CAM]NK.+3y15+2.light |
| 773.319775     | 861.383863  | sequence1.AQETS[Pho]GEEIS[Pho]KFYLPNC[CAM]NK.+3y14+2.light |
| 773.319775     | 426.207638  | sequence1.AQETS[Pho]GEEIS[Pho]KFYLPNC[CAM]NK.+3y7+2.light  |
| 773.319775     | 574.591667  | sequence1.AQETS[Pho]GEEIS[Pho]KFYLPNC[CAM]NK.+3y14+3.light |
| 773.319775     | 376.19531   | sequence1.AQETS[Pho]GEEIS[Pho]KFYLPNC[CAM]NK.+3y9+3.light  |
| 773.319775     | 230.119741  | sequence1.AQETS[Pho]GEEIS[Pho]KFYLPNC[CAM]NK.+3y6+3.light  |
| 773.319775     | 200.102967  | sequence1.AQETS[Pho]GEEIS[Pho]KFYLPNC[CAM]NK.+3b2.light    |
| 773.319775     | 329.14556   | sequence1.AQETS[Pho]GEEIS[Pho]KFYLPNC[CAM]NK.+3b3.light    |
| 773.319775     | 215.600257  | sequence1.AQETS[Pho]GEEIS[Pho]KFYLPNC[CAM]NK.+3b4+2.light  |
| 773.319775     | 734.275662  | sequence1.AQETS[Pho]GEEIS[Pho]KFYLPNC[CAM]NK.+3b12+2.light |
| 773.319775     | 1086.42326  | sequence1.AQETS[Pho]GEEIS[Pho]KFYLPNC[CAM]NK.+3b18+2.light |
| 773.319775     | 199.735383  | sequence1.AQETS[Pho]GEEIS[Pho]KFYLPNC[CAM]NK.+3b5+3.light  |
| 773.319775     | 218.742538  | sequence1.AQETS[Pho]GEEIS[Pho]KFYLPNC[CAM]NK.+3b6+3.light  |
| 773.319775     | 342.465621  | sequence1.AQETS[Pho]GEEIS[Pho]KFYLPNC[CAM]NK.+3b9+3.light  |
| 773.319775     | 489.852867  | sequence1.AQETS[Pho]GEEIS[Pho]KFYLPNC[CAM]NK.+3b12+3.light |
| 773.319775     | 652.267228  | sequence1.AQETS[Pho]GEEIS[Pho]KFYLPNC[CAM]NK.+3b16+3.light |
| 746.664331     | 575.260607  | sequence1.AQETSGEEIS[Pho]KFYLPNC[CAM]NK.+3y5.light         |
| 746.664331     | 261.155731  | sequence1.AQETSGEEIS[Pho]KFYLPNC[CAM]NK.+3y2.light         |
| 746.664331     | 904.899877  | sequence1.AQETSGEEIS[Pho]KFYLPNC[CAM]NK.+3y15+2.light      |
| 746.664331     | 861.383863  | sequence1.AQETSGEEIS[Pho]KFYLPNC[CAM]NK.+3y14+2.light      |
| 746.664331     | 426.207638  | sequence1.AQETSGEEIS[Pho]KFYLPNC[CAM]NK.+3y7+2.light       |
| 746.664331     | 574.591667  | sequence1.AQETSGEEIS[Pho]KFYLPNC[CAM]NK.+3y14+3.light      |
| 746.664331     | 376.19531   | sequence1.AQETSGEEIS[Pho]KFYLPNC[CAM]NK.+3y9+3.light       |
| 746.664331     | 230.119741  | sequence1.AQETSGEEIS[Pho]KFYLPNC[CAM]NK.+3y6+3.light       |
| 746.664331     | 200.102967  | sequence1.AQETSGEEIS[Pho]KFYLPNC[CAM]NK.+3b2.light         |
| 746.664331     | 329.14556   | sequence1.AQETSGEEIS[Pho]KFYLPNC[CAM]NK.+3b3.light         |
| 746.664331     | 215.600257  | sequence1.AQETSGEEIS[Pho]KFYLPNC[CAM]NK.+3b4+2.light       |
| 746.664331     | 694.292497  | sequence1.AQETSGEEIS[Pho]KFYLPNC[CAM]NK.+3b12+2.light      |
| 746.664331     | 1046.440095 | sequence1.AQETSGEEIS[Pho]KFYLPNC[CAM]NK.+3b18+2.light      |
| 746.664331     | 173.07994   | sequence1.AQETSGEEIS[Pho]KFYLPNC[CAM]NK.+3b5+3.light       |
| 746.664331     | 192.087094  | sequence1.AQETSGEEIS[Pho]KFYLPNC[CAM]NK.+3b6+3.light       |
| 746.664331     | 315.810178  | sequence1.AQETSGEEIS[Pho]KFYLPNC[CAM]NK.+3b9+3.light       |
| 746.664331     | 463.197423  | sequence1.AQETSGEEIS[Pho]KFYLPNC[CAM]NK.+3b12+3.light      |
| 746.664331     | 625.611785  | sequence1.AQETSGEEIS[Pho]KFYLPNC[CAM]NK.+3b16+3.light      |
| 746.664331     | 575.260607  | sequence1.AQETS[Pho]GEEISKFYLPNC[CAM]NK.+3y5.light         |
| 746.664331     | 261.155731  | sequence1.AQETS[Pho]GEEISKFYLPNC[CAM]NK.+3y2.light         |
| 746.664331     | 904.899877  | sequence1.AQETS[Pho]GEEISKFYLPNC[CAM]NK.+3y15+2.light      |
| 746.664331     | 821.400698  | sequence1.AQETS[Pho]GEEISKFYLPNC[CAM]NK.+3y14+2.light      |

746.664331 426.207638 sequence1.AQETS[Pho]GEEISKFYLPNC[CAM]NK.+3y7+2.light  
746.664331 547.936224 sequence1.AQETS[Pho]GEEISKFYLPNC[CAM]NK.+3y14+3.light  
746.664331 376.19531 sequence1.AQETS[Pho]GEEISKFYLPNC[CAM]NK.+3y9+3.light  
746.664331 230.119741 sequence1.AQETS[Pho]GEEISKFYLPNC[CAM]NK.+3y6+3.light  
746.664331 200.102967 sequence1.AQETS[Pho]GEEISKFYLPNC[CAM]NK.+3b2.light  
746.664331 329.14556 sequence1.AQETS[Pho]GEEISKFYLPNC[CAM]NK.+3b3.light  
746.664331 215.600257 sequence1.AQETS[Pho]GEEISKFYLPNC[CAM]NK.+3b4+2.light  
746.664331 694.292497 sequence1.AQETS[Pho]GEEISKFYLPNC[CAM]NK.+3b12+2.light  
746.664331 1046.440095 sequence1.AQETS[Pho]GEEISKFYLPNC[CAM]NK.+3b18+2.light  
746.664331 199.735383 sequence1.AQETS[Pho]GEEISKFYLPNC[CAM]NK.+3b5+3.light  
746.664331 218.742538 sequence1.AQETS[Pho]GEEISKFYLPNC[CAM]NK.+3b6+3.light  
746.664331 342.465621 sequence1.AQETS[Pho]GEEISKFYLPNC[CAM]NK.+3b9+3.light  
746.664331 463.197423 sequence1.AQETS[Pho]GEEISKFYLPNC[CAM]NK.+3b12+3.light  
746.664331 625.611785 sequence1.AQETS[Pho]GEEISKFYLPNC[CAM]NK.+3b16+3.light  
720.008888 575.260607 sequence1.AQETSGEEISKFYLPNC[CAM]NK.+3y5.light  
720.008888 261.155731 sequence1.AQETSGEEISKFYLPNC[CAM]NK.+3y2.light  
720.008888 864.916712 sequence1.AQETSGEEISKFYLPNC[CAM]NK.+3y15+2.light  
720.008888 821.400698 sequence1.AQETSGEEISKFYLPNC[CAM]NK.+3y14+2.light  
720.008888 426.207638 sequence1.AQETSGEEISKFYLPNC[CAM]NK.+3y7+2.light  
720.008888 547.936224 sequence1.AQETSGEEISKFYLPNC[CAM]NK.+3y14+3.light  
720.008888 376.19531 sequence1.AQETSGEEISKFYLPNC[CAM]NK.+3y9+3.light  
720.008888 230.119741 sequence1.AQETSGEEISKFYLPNC[CAM]NK.+3y6+3.light  
720.008888 200.102967 sequence1.AQETSGEEISKFYLPNC[CAM]NK.+3b2.light  
720.008888 329.14556 sequence1.AQETSGEEISKFYLPNC[CAM]NK.+3b3.light  
720.008888 215.600257 sequence1.AQETSGEEISKFYLPNC[CAM]NK.+3b4+2.light  
720.008888 654.309331 sequence1.AQETSGEEISKFYLPNC[CAM]NK.+3b12+2.light  
720.008888 1006.456929 sequence1.AQETSGEEISKFYLPNC[CAM]NK.+3b18+2.light  
720.008888 173.07994 sequence1.AQETSGEEISKFYLPNC[CAM]NK.+3b5+3.light  
720.008888 192.087094 sequence1.AQETSGEEISKFYLPNC[CAM]NK.+3b6+3.light  
720.008888 315.810178 sequence1.AQETSGEEISKFYLPNC[CAM]NK.+3b9+3.light  
720.008888 436.54198 sequence1.AQETSGEEISKFYLPNC[CAM]NK.+3b12+3.light  
720.008888 598.956341 sequence1.AQETSGEEISKFYLPNC[CAM]NK.+3b16+3.light  
976.396683 1076.535762 peptides2.DASAPHAAEAGSPES[Pho]PES[Pho]TEITEEELL.+3y9.light  
976.396683 975.488084 peptides2.DASAPHAAEAGSPES[Pho]PES[Pho]TEITEEELL.+3y8.light  
976.396683 503.271155 peptides2.DASAPHAAEAGSPES[Pho]PES[Pho]TEITEEELL.+3y4.light  
976.396683 245.185969 peptides2.DASAPHAAEAGSPES[Pho]PES[Pho]TEITEEELL.+3y2.light  
976.396683 1292.024787 peptides2.DASAPHAAEAGSPES[Pho]PES[Pho]TEITEEELL.+3y23+2.light  
976.396683 1103.931835 peptides2.DASAPHAAEAGSPES[Pho]PES[Pho]TEITEEELL.+3y19+2.light  
976.396683 1003.891982 peptides2.DASAPHAAEAGSPES[Pho]PES[Pho]TEITEEELL.+3y17+2.light  
976.396683 931.865236 peptides2.DASAPHAAEAGSPES[Pho]PES[Pho]TEITEEELL.+3y15+2.light  
976.396683 883.338854 peptides2.DASAPHAAEAGSPES[Pho]PES[Pho]TEITEEELL.+3y14+2.light  
976.396683 735.318377 peptides2.DASAPHAAEAGSPES[Pho]PES[Pho]TEITEEELL.+3y12+2.light  
976.396683 488.24768 peptides2.DASAPHAAEAGSPES[Pho]PES[Pho]TEITEEELL.+3y8+2.light  
976.396683 621.579249 peptides2.DASAPHAAEAGSPES[Pho]PES[Pho]TEITEEELL.+3y15+3.light  
976.396683 458.197089 peptides2.DASAPHAAEAGSPES[Pho]PES[Pho]TEITEEELL.+3y11+3.light  
976.396683 978.427549 peptides2.DASAPHAAEAGSPES[Pho]PES[Pho]TEITEEELL.+3b11.light  
976.396683 1458.553294 peptides2.DASAPHAAEAGSPES[Pho]PES[Pho]TEITEEELL.+3b15.light

976.396683 173.073876 peptides2.DASAPHAAEAGSPES[Pho]PES[Pho]TEITEEELL.+3b4+2.light  
976.396683 1097.914311 peptides2.DASAPHAAEAGSPES[Pho]PES[Pho]TEITEEELL.+3b21+2.light  
976.396683 388.175631 peptides2.DASAPHAAEAGSPES[Pho]PES[Pho]TEITEEELL.+3b13+3.light  
976.396683 562.221068 peptides2.DASAPHAAEAGSPES[Pho]PES[Pho]TEITEEELL.+3b17+3.light  
949.741239 1076.535762 peptides2.DASAPHAAEAGSPESPES[Pho]TEITEEELL.+3y9.light  
949.741239 975.488084 peptides2.DASAPHAAEAGSPESPES[Pho]TEITEEELL.+3y8.light  
949.741239 503.271155 peptides2.DASAPHAAEAGSPESPES[Pho]TEITEEELL.+3y4.light  
949.741239 245.185969 peptides2.DASAPHAAEAGSPESPES[Pho]TEITEEELL.+3y2.light  
949.741239 1252.041621 peptides2.DASAPHAAEAGSPESPES[Pho]TEITEEELL.+3y23+2.light  
949.741239 1063.94867 peptides2.DASAPHAAEAGSPESPES[Pho]TEITEEELL.+3y19+2.light  
949.741239 963.908816 peptides2.DASAPHAAEAGSPESPES[Pho]TEITEEELL.+3y17+2.light  
949.741239 891.88207 peptides2.DASAPHAAEAGSPESPES[Pho]TEITEEELL.+3y15+2.light  
949.741239 843.355688 peptides2.DASAPHAAEAGSPESPES[Pho]TEITEEELL.+3y14+2.light  
949.741239 735.318377 peptides2.DASAPHAAEAGSPESPES[Pho]TEITEEELL.+3y12+2.light  
949.741239 488.24768 peptides2.DASAPHAAEAGSPESPES[Pho]TEITEEELL.+3y8+2.light  
949.741239 594.923805 peptides2.DASAPHAAEAGSPESPES[Pho]TEITEEELL.+3y15+3.light  
949.741239 458.197089 peptides2.DASAPHAAEAGSPESPES[Pho]TEITEEELL.+3y11+3.light  
949.741239 978.427549 peptides2.DASAPHAAEAGSPESPES[Pho]TEITEEELL.+3b11.light  
949.741239 1378.586963 peptides2.DASAPHAAEAGSPESPES[Pho]TEITEEELL.+3b15.light  
949.741239 173.073876 peptides2.DASAPHAAEAGSPESPES[Pho]TEITEEELL.+3b4+2.light  
949.741239 1057.931146 peptides2.DASAPHAAEAGSPESPES[Pho]TEITEEELL.+3b21+2.light  
949.741239 388.175631 peptides2.DASAPHAAEAGSPESPES[Pho]TEITEEELL.+3b13+3.light  
949.741239 535.565624 peptides2.DASAPHAAEAGSPESPES[Pho]TEITEEELL.+3b17+3.light  
949.741239 1076.535762 peptides2.DASAPHAAEAGSPES[Pho]PESTEITEEELL.+3y9.light  
949.741239 975.488084 peptides2.DASAPHAAEAGSPES[Pho]PESTEITEEELL.+3y8.light  
949.741239 503.271155 peptides2.DASAPHAAEAGSPES[Pho]PESTEITEEELL.+3y4.light  
949.741239 245.185969 peptides2.DASAPHAAEAGSPES[Pho]PESTEITEEELL.+3y2.light  
949.741239 1252.041621 peptides2.DASAPHAAEAGSPES[Pho]PESTEITEEELL.+3y23+2.light  
949.741239 1063.94867 peptides2.DASAPHAAEAGSPES[Pho]PESTEITEEELL.+3y19+2.light  
949.741239 963.908816 peptides2.DASAPHAAEAGSPES[Pho]PESTEITEEELL.+3y17+2.light  
949.741239 891.88207 peptides2.DASAPHAAEAGSPES[Pho]PESTEITEEELL.+3y15+2.light  
949.741239 843.355688 peptides2.DASAPHAAEAGSPES[Pho]PESTEITEEELL.+3y14+2.light  
949.741239 695.335212 peptides2.DASAPHAAEAGSPES[Pho]PESTEITEEELL.+3y12+2.light  
949.741239 488.24768 peptides2.DASAPHAAEAGSPES[Pho]PESTEITEEELL.+3y8+2.light  
949.741239 594.923805 peptides2.DASAPHAAEAGSPES[Pho]PESTEITEEELL.+3y15+3.light  
949.741239 431.541645 peptides2.DASAPHAAEAGSPES[Pho]PESTEITEEELL.+3y11+3.light  
949.741239 978.427549 peptides2.DASAPHAAEAGSPES[Pho]PESTEITEEELL.+3b11.light  
949.741239 1458.553294 peptides2.DASAPHAAEAGSPES[Pho]PESTEITEEELL.+3b15.light  
949.741239 173.073876 peptides2.DASAPHAAEAGSPES[Pho]PESTEITEEELL.+3b4+2.light  
949.741239 1057.931146 peptides2.DASAPHAAEAGSPES[Pho]PESTEITEEELL.+3b21+2.light  
949.741239 388.175631 peptides2.DASAPHAAEAGSPES[Pho]PESTEITEEELL.+3b13+3.light  
949.741239 562.221068 peptides2.DASAPHAAEAGSPES[Pho]PESTEITEEELL.+3b17+3.light  
923.085796 1076.535762 peptides2.DASAPHAAEAGSPESPESTEITEEELL.+3y9.light  
923.085796 975.488084 peptides2.DASAPHAAEAGSPESPESTEITEEELL.+3y8.light  
923.085796 503.271155 peptides2.DASAPHAAEAGSPESPESTEITEEELL.+3y4.light  
923.085796 245.185969 peptides2.DASAPHAAEAGSPESPESTEITEEELL.+3y2.light  
923.085796 1212.058456 peptides2.DASAPHAAEAGSPESPESTEITEEELL.+3y23+2.light

923.085796 1023.965504 peptides2.DASAPHAAEAGSPESPESTEITEEELL.+3y19+2.light  
923.085796 923.925651 peptides2.DASAPHAAEAGSPESPESTEITEEELL.+3y17+2.light  
923.085796 851.898905 peptides2.DASAPHAAEAGSPESPESTEITEEELL.+3y15+2.light  
923.085796 803.372523 peptides2.DASAPHAAEAGSPESPESTEITEEELL.+3y14+2.light  
923.085796 695.335212 peptides2.DASAPHAAEAGSPESPESTEITEEELL.+3y12+2.light  
923.085796 488.24768 peptides2.DASAPHAAEAGSPESPESTEITEEELL.+3y8+2.light  
923.085796 568.268362 peptides2.DASAPHAAEAGSPESPESTEITEEELL.+3y15+3.light  
923.085796 431.541645 peptides2.DASAPHAAEAGSPESPESTEITEEELL.+3y11+3.light  
923.085796 978.427549 peptides2.DASAPHAAEAGSPESPESTEITEEELL.+3b11.light  
923.085796 1378.586963 peptides2.DASAPHAAEAGSPESPESTEITEEELL.+3b15.light  
923.085796 173.073876 peptides2.DASAPHAAEAGSPESPESTEITEEELL.+3b4+2.light  
923.085796 1017.94798 peptides2.DASAPHAAEAGSPESPESTEITEEELL.+3b21+2.light  
923.085796 388.175631 peptides2.DASAPHAAEAGSPESPESTEITEEELL.+3b13+3.light  
923.085796 535.565624 peptides2.DASAPHAAEAGSPESPESTEITEEELL.+3b17+3.light  
645.276977 461.187819 sequence1.DNFHLMAPSEE.+2y4.light  
645.276977 388.678379 sequence1.DNFHLMAPSEE.+2y7+2.light  
645.276977 332.136347 sequence1.DNFHLMAPSEE.+2y6+2.light  
645.276977 266.616105 sequence1.DNFHLMAPSEE.+2y5+2.light  
645.276977 230.077147 sequence1.DNFHLMAPSEE.+2b2.light  
645.276977 377.14556 sequence1.DNFHLMAPSEE.+2b3.light  
645.276977 829.366135 sequence1.DNFHLMAPSEE.+2b7.light  
645.276977 463.713087 sequence1.DNFHLMAPSEE.+2b8+2.light  
645.276977 507.229102 sequence1.DNFHLMAPSEE.+2b9+2.light  
430.52041 1174.519735 sequence1.DNFHLMAPSEE.+3y10.light  
430.52041 461.187819 sequence1.DNFHLMAPSEE.+3y4.light  
430.52041 332.136347 sequence1.DNFHLMAPSEE.+3y6+2.light  
430.52041 266.616105 sequence1.DNFHLMAPSEE.+3y5+2.light  
430.52041 354.163787 sequence1.DNFHLMAPSEE.+3y9+3.light  
430.52041 305.140982 sequence1.DNFHLMAPSEE.+3y8+3.light  
430.52041 178.079828 sequence1.DNFHLMAPSEE.+3y5+3.light  
430.52041 154.40079 sequence1.DNFHLMAPSEE.+3y4+3.light  
430.52041 230.077147 sequence1.DNFHLMAPSEE.+3b2.light  
430.52041 829.366135 sequence1.DNFHLMAPSEE.+3b7.light  
430.52041 415.186705 sequence1.DNFHLMAPSEE.+3b7+2.light  
430.52041 172.073008 sequence1.DNFHLMAPSEE.+3b4+3.light  
430.52041 253.447858 sequence1.DNFHLMAPSEE.+3b6+3.light  
685.260143 541.15415 sequence1.DNFHLMAPS[Pho]EE.+2y4.light  
685.260143 428.661544 sequence1.DNFHLMAPS[Pho]EE.+2y7+2.light  
685.260143 372.119512 sequence1.DNFHLMAPS[Pho]EE.+2y6+2.light  
685.260143 306.59927 sequence1.DNFHLMAPS[Pho]EE.+2y5+2.light  
685.260143 230.077147 sequence1.DNFHLMAPS[Pho]EE.+2b2.light  
685.260143 377.14556 sequence1.DNFHLMAPS[Pho]EE.+2b3.light  
685.260143 829.366135 sequence1.DNFHLMAPS[Pho]EE.+2b7.light  
685.260143 463.713087 sequence1.DNFHLMAPS[Pho]EE.+2b8+2.light  
685.260143 547.212267 sequence1.DNFHLMAPS[Pho]EE.+2b9+2.light  
457.175854 1254.486066 sequence1.DNFHLMAPS[Pho]EE.+3y10.light  
457.175854 541.15415 sequence1.DNFHLMAPS[Pho]EE.+3y4.light

457.175854 372.119512 sequence1.DNFHLMAPS[Pho]EE.+3y6+2.light  
457.175854 306.59927 sequence1.DNFHLMAPS[Pho]EE.+3y5+2.light  
457.175854 380.81923 sequence1.DNFHLMAPS[Pho]EE.+3y9+3.light  
457.175854 331.796426 sequence1.DNFHLMAPS[Pho]EE.+3y8+3.light  
457.175854 204.735272 sequence1.DNFHLMAPS[Pho]EE.+3y5+3.light  
457.175854 181.056234 sequence1.DNFHLMAPS[Pho]EE.+3y4+3.light  
457.175854 230.077147 sequence1.DNFHLMAPS[Pho]EE.+3b2.light  
457.175854 829.366135 sequence1.DNFHLMAPS[Pho]EE.+3b7.light  
457.175854 415.186705 sequence1.DNFHLMAPS[Pho]EE.+3b7+2.light  
457.175854 172.073008 sequence1.DNFHLMAPS[Pho]EE.+3b4+3.light  
457.175854 253.447858 sequence1.DNFHLMAPS[Pho]EE.+3b6+3.light
